# Supplementary material for: Establishing RTS,S/AS01 as a benchmark for comparison to next-generation malaria vaccines in a mouse model
Source: PubMed Central journal article supplement (PMC10858969; doi:10.1038/s41541-024-00819-x), 2024-02-10
Supplement: 41541_2024_819_MOESM1_ESM.pdf [file 41541_2024_819_MOESM1_ESM.pdf]

Supplementary data.

**Supplementary Table 1. Adjusted flux variation estimated from using linear mixed effects models for each total dose and dose-level combination (ten models, one per row).** For each animal, the adjusted  $\log_{10}$  flux was calculated by subtracting the  $\log_{10}$  flux from the experiment-matched mean  $\log_{10}$  flux from the naïve infected control group and represents the treatment effect relative to the control group. The adjusted mean  $\log_{10}$  flux (photons/sec) is the mean across experiments from the model. The intraclass correlation is the total variance attributed to differences between experiments; a value of zero implies concordance across experiments.

| Number of administrations | Treatment group | Mice | Experiments | Adjusted mean flux (log10 photons/sec) | SD (log <sub>10</sub> flux) |                   | Intraclass correlation (%) |
|---------------------------|-----------------|------|-------------|----------------------------------------|-----------------------------|-------------------|----------------------------|
|                           |                 |      |             |                                        | Between-experiment          | Within-experiment |                            |
| 2                         | 0.05 µg RTS,S   | 15   | 3           | 0.020                                  | 0.000                       | 0.143             | 0.0                        |
|                           | 0.2 µg RTS,S    | 15   | 3           | 0.307                                  | 0.000                       | 0.155             | 0.0                        |
|                           | 1 µg RTS,S      | 15   | 3           | 0.549                                  | 0.000                       | 0.282             | 0.0                        |
|                           | 5 µg RTS,S      | 15   | 3           | 0.716                                  | 0.085                       | 0.221             | 12.9                       |
|                           | 10 µg RTS,S     | 15   | 3           | 0.559                                  | 0.071                       | 0.221             | 9.3                        |
| 3                         | 0.05 µg RTS,S   | 10   | 2           | 0.448                                  | 0.000                       | 0.370             | 0.0                        |
|                           | 0.2 µg RTS,S    | 10   | 2           | 0.878                                  | 0.167                       | 0.398             | 14.9                       |
|                           | 1 µg RTS,S      | 10   | 2           | 1.258                                  | 0.059                       | 0.510             | 1.3                        |
|                           | 5 µg RTS,S      | 10   | 2           | 1.277                                  | 0.000                       | 0.361             | 0.0                        |
|                           | 10 µg RTS,S     | 10   | 2           | 1.405                                  | 0.061                       | 0.376             | 2.6                        |

**Supplementary Table 2. Statistical tests were performed using linear regression models to compare  $\log_{10}$  flux reduction between each RTS,S/AS01 vaccine group and the AB317 group.** All tests were two-sided (alpha = 0.05), unadjusted and adjusted (Holm correction) p-values are displayed. See Table 2 for sample sizes.

| Number of administrations | Comparison            | Difference in $\log_{10}$ flux reduction | p-value (unadjusted) | p-value (adjusted) |
|---------------------------|-----------------------|------------------------------------------|----------------------|--------------------|
| 2                         | 0.05 µg RTS,S - AB317 | 1.70                                     | <0.001               | <0.001             |
|                           | 0.2 µg RTS,S - AB317  | 1.41                                     | <0.001               | <0.001             |
|                           | 1 µg RTS,S - AB317    | 1.17                                     | <0.001               | <0.001             |
|                           | 5 µg RTS,S - AB317    | 1.00                                     | <0.001               | <0.001             |
|                           | 10 µg RTS,S - AB317   | 1.16                                     | <0.001               | <0.001             |
| 3                         | 0.05 µg RTS,S - AB317 | 1.27                                     | <0.001               | <0.001             |
|                           | 0.2 µg RTS,S - AB317  | 0.84                                     | <0.001               | <0.001             |
|                           | 1 µg RTS,S - AB317    | 0.46                                     | <0.001               | 0.002              |
|                           | 5 µg RTS,S - AB317    | 0.44                                     | 0.001                | 0.002              |
|                           | 10 µg RTS,S - AB317   | 0.31                                     | 0.018                | 0.018              |

**Supplementary Table 3. Results from ten linear mixed effects models for the pooled treatment groups.** The mean log<sub>10</sub> sera 2A10 concentration (µg/mL) is the mean across experiments (the fixed effect intercept) from the model. The intraclass correlation is the total variance attributed to differences between experiments; a value of zero implies concordance across experiments.

| Number of administrations | Treatment group | Mice treated | Experiments | Mean log <sub>10</sub> sera 2A10 (µg/mL) | SD (Log <sub>10</sub> sera 2A10) |                   | Intraclass correlation (%) |
|---------------------------|-----------------|--------------|-------------|------------------------------------------|----------------------------------|-------------------|----------------------------|
|                           |                 |              |             |                                          | Between-experiment               | Within-experiment |                            |
| 2                         | 0.05 µg RTS,S   | 15           | 3           | 0.12                                     | 0.000                            | 0.651             | 0.0                        |
|                           | 0.2 µg RTS,S    | 15           | 3           | 1.56                                     | 0.355                            | 0.333             | 53.3                       |
|                           | 1 µg RTS,S      | 15           | 3           | 1.87                                     | 0.000                            | 0.284             | 0.0                        |
|                           | 5 µg RTS,S      | 15           | 3           | 2.02                                     | 0.000                            | 0.176             | 0.0                        |
|                           | 10 µg RTS,S     | 15           | 3           | 1.79                                     | 0.000                            | 0.237             | 0.0                        |
| 3                         | 0.05 µg RTS,S   | 10           | 2           | 1.71                                     | 0.000                            | 0.417             | 0.0                        |
|                           | 0.2 µg RTS,S    | 10           | 2           | 2.05                                     | 0.000                            | 0.449             | 0.0                        |
|                           | 1 µg RTS,S      | 10           | 2           | 2.26                                     | 0.000                            | 0.387             | 0.0                        |
|                           | 5 µg RTS,S      | 10           | 2           | 2.32                                     | 0.000                            | 0.157             | 0.0                        |
|                           | 10 µg RTS,S     | 10           | 2           | 2.41                                     | 0.000                            | 0.224             | 0.0                        |

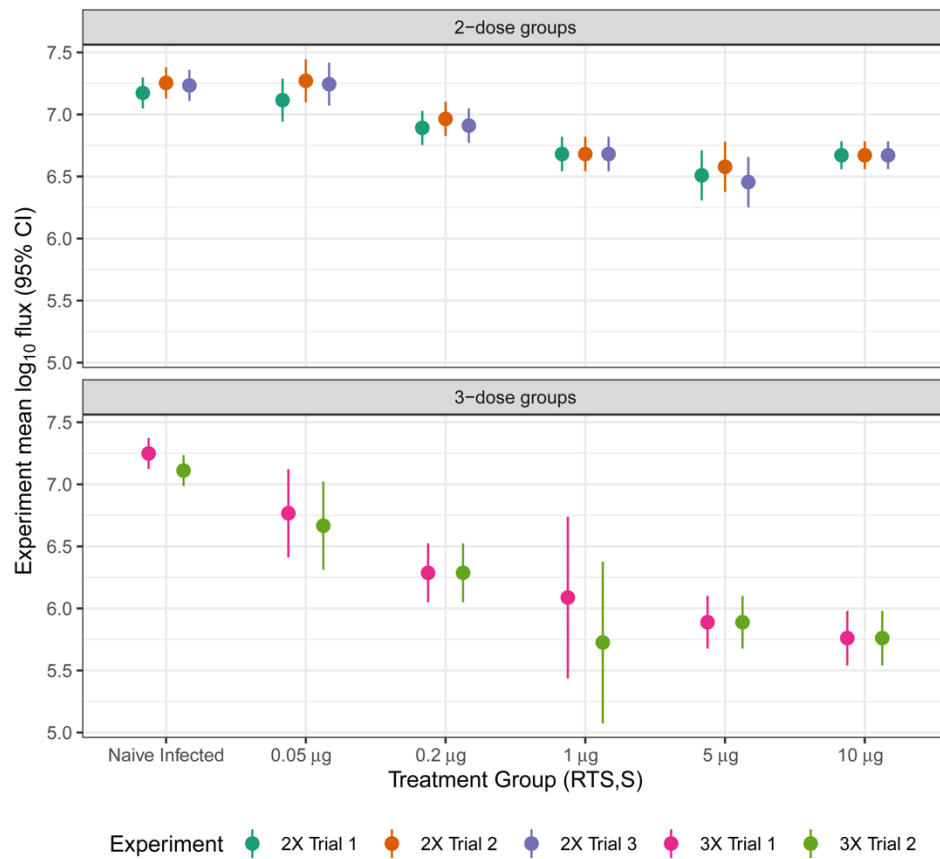

**Supplementary Figure 1. Experiment-level mean log<sub>10</sub> flux with 95% confidence intervals (CIs) among the vaccine groups and naïve infected controls.** This was estimated using linear random effects models. CIs depict intra-assay precision while variation between the means depict inter-assay variability.

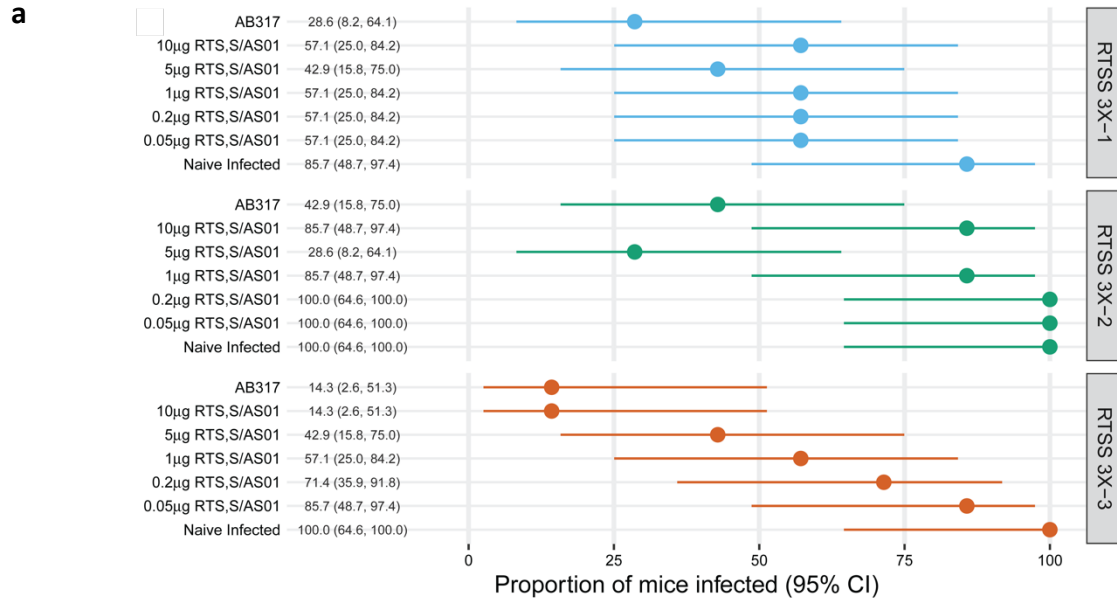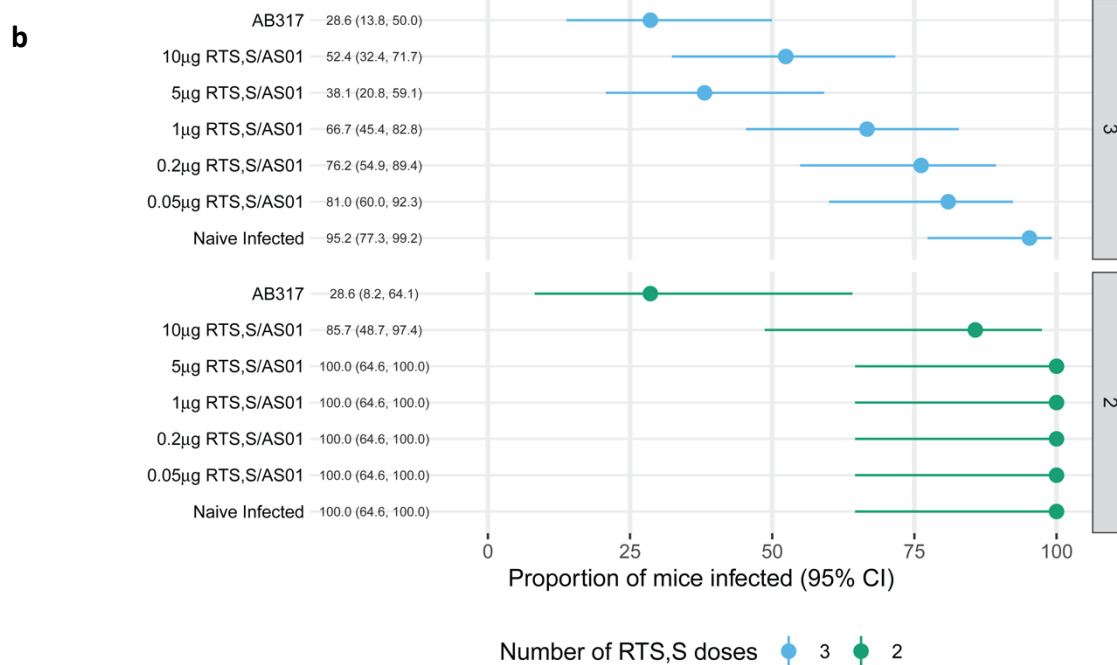

**Supplementary Figure 2. Proportion of infected mice among RTS,S/AS01 treatment and control groups with 95% Wilson Cis.** Faceted by: (a) each three-dose mosquito bite challenge experiment; and (b) number of RTS,S/AS01 doses with data pooled across the three replicate 3x vaccination experiments and the single replicate of 2x vaccination.

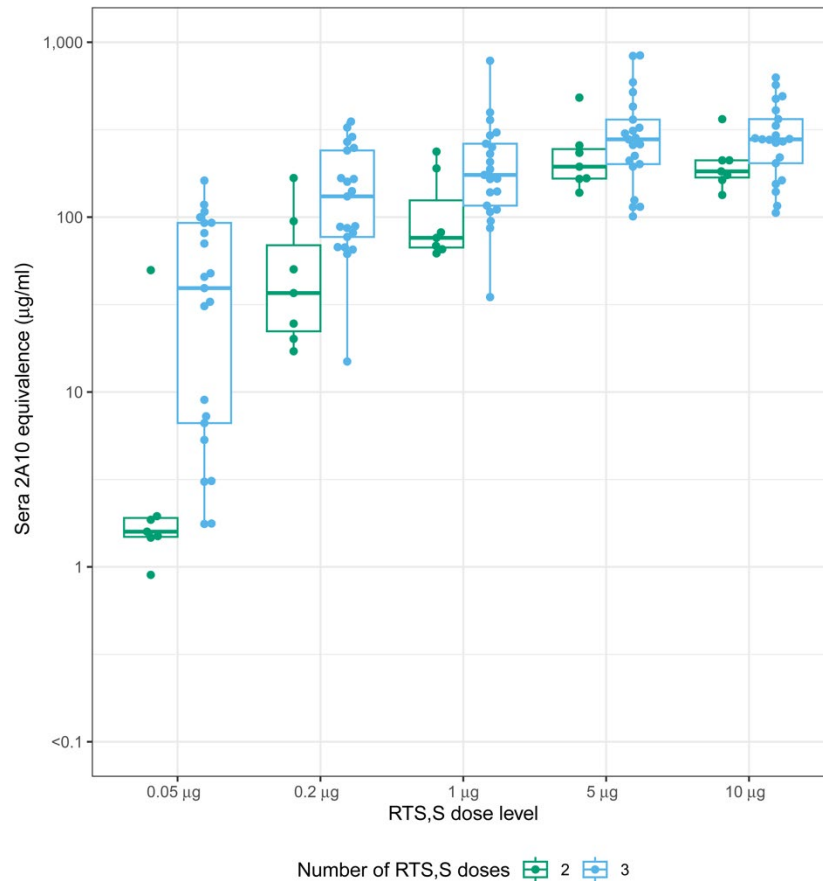

**Supplementary Figure 3. Distribution of RTS,S-induced sera antibody concentrations two days prior to challenge (2A10 equivalence ( $\mu\text{g}/\text{mL}$ ) by total doses administered and dose levels for the mosquito bite challenge experiments.** Points indicate measurements from individual animals. The mid-line of the boxes denotes the median and the ends of the box denote the 25<sup>th</sup> and 75<sup>th</sup> percentiles. The whiskers denote the most extreme data points that were no more than 1.5 times the interquartile range (i.e., height of the box).

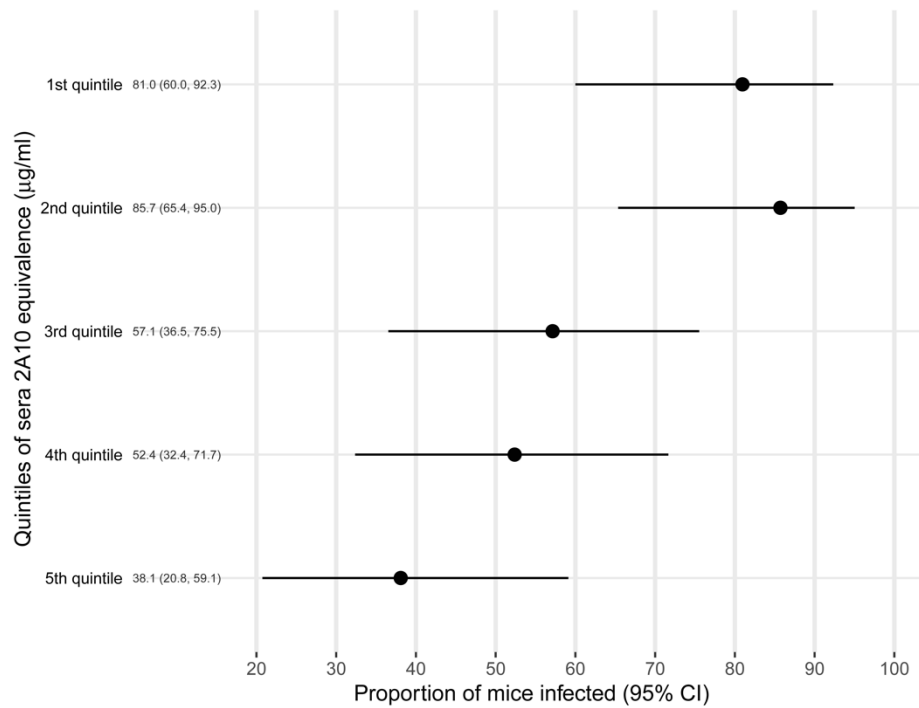

**Supplementary Figure 4. Proportion of infected mice with 95% CIs (written on plot) in each quintile of antibody concentration.** Antibody was measured as sera 2A10 equivalence for the 3x-dose experiments.

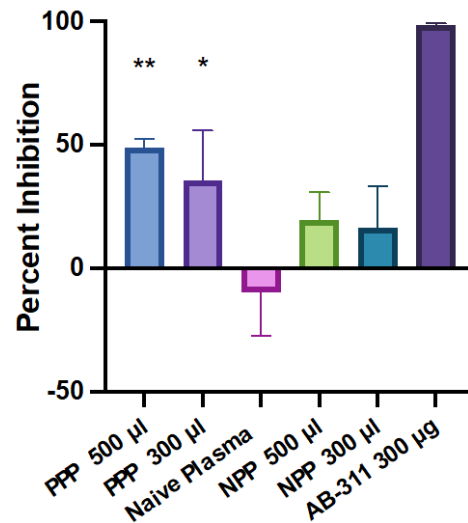

**Supplementary Figure 5: Liver infection measured in mice receiving via passive transfer 300 µL or 500 µL of pooled day of challenge human plasma samples from protected (n = 24) and non-protected (n = 12) subjects.** Plasma from AduFx and 2PedFx cohorts receiving the adult dose or a double pediatric dose, thus the same amount of antigen and adjuvant, on a 0, 1, 7 – month schedule of the MAL092 CHMI study. Mouse treatment groups n = 5. Plasma from pooled protected subjects conferred greater inhibition of liver infection than plasma from non-protected subjects. Asterisks (\*) indicate significant reduction in liver infection compared to naïve infected mice (p = 0.0079 for the 500 µL cohort and 0.0317 for the 300 µL cohort, Mann-Whitney U test). Naïve infected mice and AB311 were used as negative and positive controls respectively.
